# Supplementary material for: Changes in transcriptome profiling during the acute/subacute phases of contusional spinal cord injury in rats
Source: PubMed Central journal article supplement — Ann Transl Med. 2020 Dec;8(24):1682. doi: 10.21037/atm-20-6519 (PMC7812200; doi:10.21037/atm-20-6519), 2020-12
Supplement: atm-08-24-1682-supplementary.pdf [file atm-08-24-1682-supplementary.pdf]

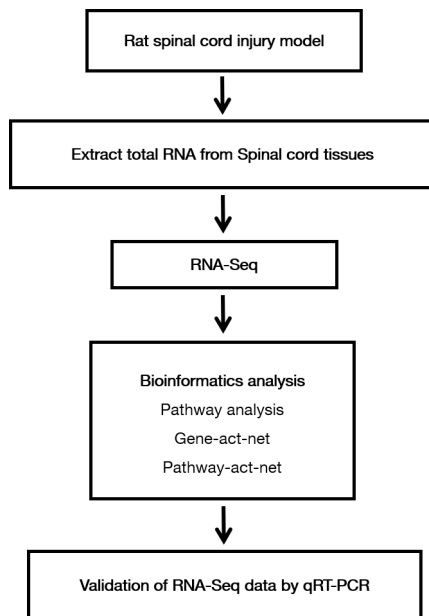

**Figure S1** Schematic of the experiment.

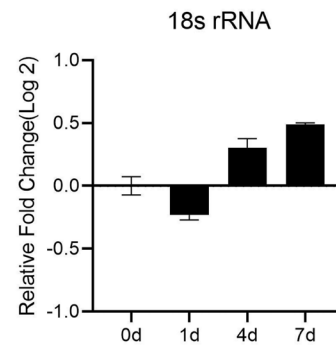

**Figure S2** The expression difference of 18s at different time points, using GAPDH as the internal reference.

**Table S1** Primer sequences for qRT-PCR

| Gene   | Forward primer           | Reverse primer        |
|--------|--------------------------|-----------------------|
| Mapk9  | CTGTTTGGTATGACCCCGCT     | ACTGCTGCATCTGAAGGCTG  |
| Ii1b   | TCCTCTGTGACTCGTGGGAT     | TGGAGAATACCACTTGTGGCT |
| Nos2   | CAGGCTTGGGTCTTGTTAGC     | GTGTTGTTGGGCTGGGAATAG |
| Sdc1   | CTGGGAGGTGTCATTGCTGG     | CTAGTGAGTGGCAGGGGTTG  |
| Itgb7  | ATGGGAAACTGGGTGGCATT     | TGGCTCAGCTCCTGATACAC  |
| Icam1  | CTGTCCGTGCTCAGGTATCC     | CGCTCTGGGAACGAATACACA |
| Jak3   | CGCCTCCATCTCTGGAGTTTT    | ATAAACGGGCAGGATGCCACA |
| Myd88  | TCGACGCCTTCATCTGCTAC     | CCATGCGACGACACCTTTTC  |
| Ccr1   | GTACTIONTGGAAACACAGACTCA | TCTGTGGTTGTGGGTAGGT   |
| Hck    | TTCTGGAGGAGTCTGGGGAG     | ATCCTTCCGGCTGATACCCT  |
| Lyn    | TGAAGACTCAACCAGTTCCTGA   | ACAAGTCGTCTGGGTGGATG  |
| Itgb2  | CTTAACCTGCGACCAGGGCA     | AGGCTTTCTCCTTGTGGGG   |
| Gusb   | GCTCGGGGCAAATTCCTTTC     | CGACCGCAGGGTGATTTTTG  |
| Gpx1   | GCTCACCCGCTCTTTACCTT     | GATGTCGATGGTGCGAAAGC  |
| Plcg2  | GATCAACCCTTCCATGCCTC     | TCCTTGAGACGTTGTGGATG  |
| Cxcr4  | TGCCATGGAAATATACACTTCGG  | TGCCACTATGCCAGTCAAG   |
| Mgst2  | CAGCCCATCAGGGTCTAA       | GAATCCCCGCCATCTTTCT   |
| Pla2g3 | ACCTGGGTGTCTCTGTCACT     | GAGGGAACCTAAGGCTCAGCG |

**Table S2** Summary of sequencing results and base accuracy

| Sample name | 0 d                    | 1 d                    | 4 d                   | 7 d                    |
|-------------|------------------------|------------------------|-----------------------|------------------------|
| Reads       | Read 1; Read 2         | Read 1; Read 2         | Read 1; Read 2        | Read 1; Read 2         |
| Raw reads   | 38652664; 38652664     | 36302891; 36302891     | 37142295; 37142295    | 33799439; 33799439     |
| Raw bases   | 3903919064; 3903919064 | 3666591991; 3666591991 | 3751371795 3751371795 | 3413743339; 3413743339 |
| %Q20        | 97.13; 92.56           | 97.06; 92.01           | 97.11; 92.76          | 97.06; 92.72           |
| %Q30        | 91.68; 85.40           | 91.53; 84.59           | 91.65; 85.74          | 91.54; 85.69           |
